# Supplementary material for: Monocyte-Derived Leukemia-Associated Macrophages Facilitate Extramedullary Distribution of T-cell Acute Lymphoblastic Leukemia Cells
Source: Oxford University Press journal article supplement (doi:10.1158/0008-5472.can-20-0034), 2020-07-10
Supplement: 00085472can200034-sup-235049_3_supp_6354660_qbsy74.pdf [file 00085472can200034-sup-235049_3_supp_6354660_qbsy74.pdf]

**Yang FF, et al. Figure S1**

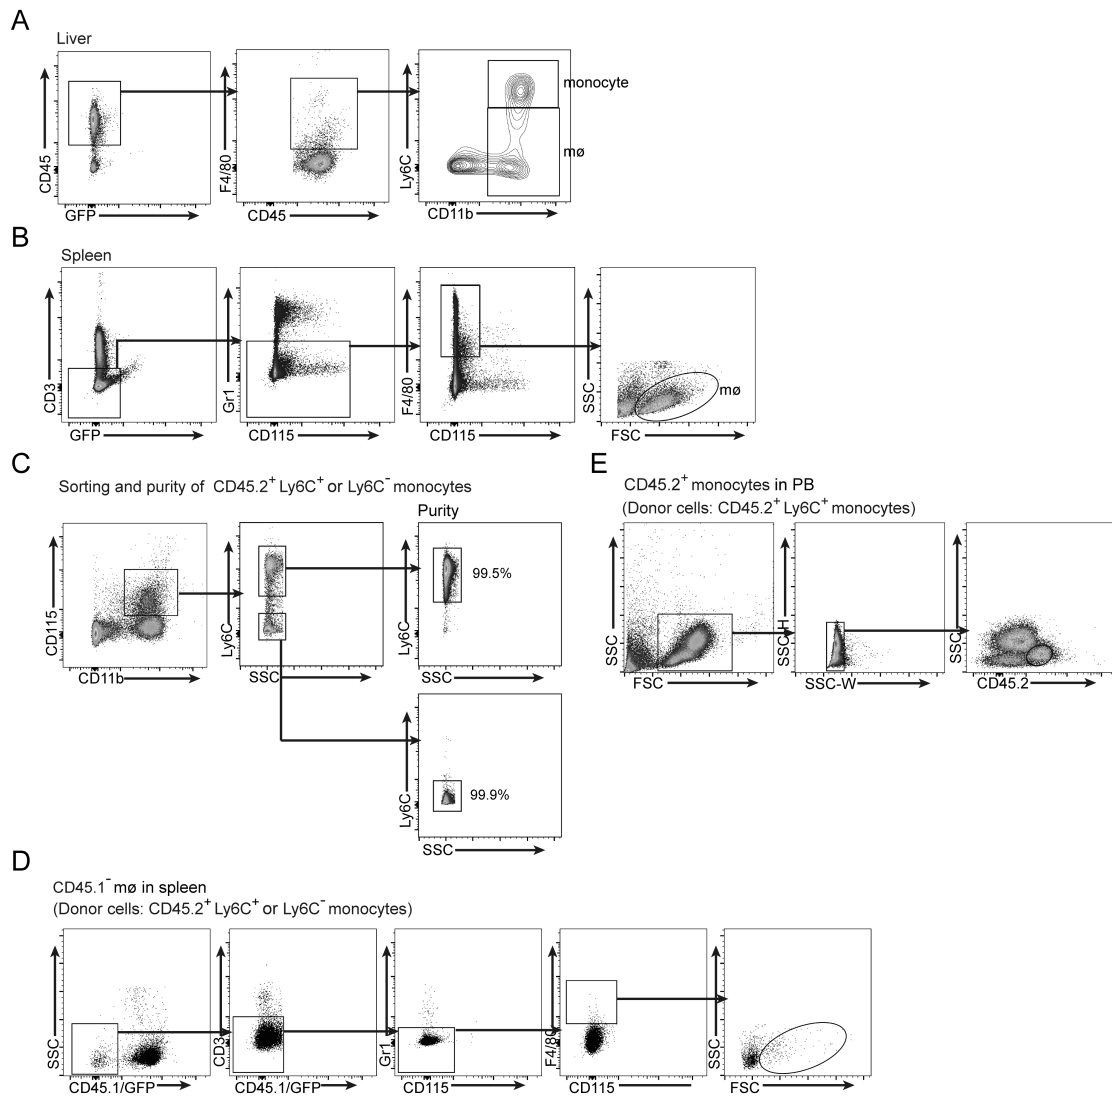

**Figure S1. Gating strategy for macrophages in the liver and SP as well as monocytes/macrophages in the transplantation experiments at the steady state.**

Gating strategy for macrophages in liver (A) and SP (B). (C) Gating strategy for sorting Ly6C<sup>+</sup> and Ly6C<sup>-</sup> monocytes from CD45.2<sup>+</sup> donor. The purity of sorted cells is shown. (D) Gating strategy for CD45.1<sup>-</sup> macrophages in the SP after transplantation of CD45.2<sup>+</sup> Ly6C<sup>+</sup> or Ly6C<sup>-</sup> monocytes. (E) Gating strategy for CD45.2<sup>+</sup> monocytes in PB after transplantation of CD45.2<sup>+</sup> Ly6C<sup>+</sup> monocytes.
